# Supplementary material for: HaCaT Cells as a Reliable In Vitro Differentiation Model to Dissect the Inflammatory/Repair Response of Human Keratinocytes
Source: Hindawi journal article supplement (doi:10.1155/2017/7435621), 2017-01-01

## Supplementary

**Table 1S: Cell recovery and protein content of HaCaT cells grown in low (A) or high (C)  $\text{Ca}^{2+}$  medium for 6 (A6, C6) or 14 (A14, C14) days**

| Cell culture | Cells number<br>$10^6/\text{well} \pm \text{s.d.}$ | Protein<br>$\mu\text{g}/10^6 \text{ cells} \pm \text{s.d.}$ |
|--------------|----------------------------------------------------|-------------------------------------------------------------|
| A6           | $10.14 \pm 1.51^{\text{a}}$                        | $192.39 \pm 46.90^{\text{c}}$                               |
| C6           | $6.08 \pm 1.66^{\text{a}}$                         | $194.04 \pm 51.93^{\text{c}}$                               |
| A14          | $38.27 \pm 6.38^{\text{b}}$                        | $132.32 \pm 39.13^{\text{c}}$                               |
| C14          | $15.43 \pm 5.30^{\text{b}}$                        | $143.40 \pm 37.47^{\text{c}}$                               |

Notes:

<sup>a</sup>average from 24 independent cell counts

<sup>b</sup>average from 40 independent cell counts

<sup>c</sup>average from 12 independent assays

## Figure legends

### **Figure S1. Changes in HaCaT cell morphology during cell differentiation.**

Morphological changes in HaCat cells, grown in low (A) and high (C)  $\text{Ca}^{2+}$ -containing medium for 6 (A6 and C6) and 14 (A14 and C14) days were analyzed by phase contrast microscopy.

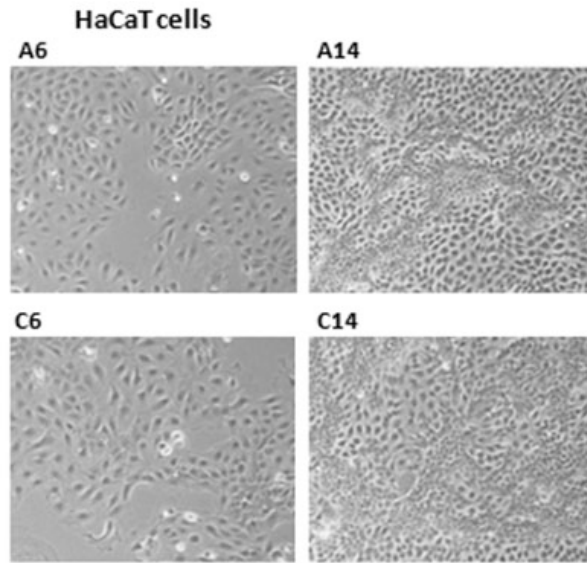

**Figure S2. *In vitro* release of CXCL8/IL8, VEGF and MMP-9 from HaCat cells stimulated by IL-1 $\beta$  during cell differentiation.**

The amount of CXCL8/IL8, VEGF and MMP-9 was measured by ELISA assay in the supernatants of HaCaT cells plated at the same density ( $1.0 \times 10^4$  cells/cm<sup>2</sup>), grown in low (A) and high (C) Ca<sup>2+</sup>-containing medium for 6 (A6 and C6) and 14 (A14 and C14) days (white bars) and treated with 10 ng/ml IL-1 $\beta$  for 6 or 24 hours (black bars), as indicated, in the absence (*Panel A*) or in the presence (*Panel B*) of serum. The data are expressed as pg/10<sup>6</sup> cells and values are the mean  $\pm$  s.d. of at least three independent cell culture experiments in duplicate.

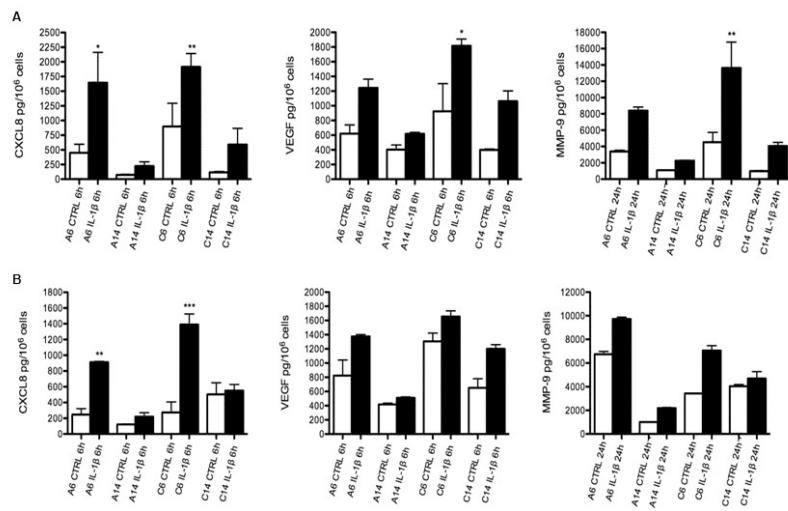

Supplement: f1 [file 7435621.f1.pdf]
